# Supplementary material for: Stability of ZIF-8 Nanoparticles in Most Common Cell Culture Media
Source: MDPI journal article supplement (doi:10.3390/molecules27103240), 2022-05-18
Supplement: s1 [file s1]

## SUPPORTING INFORMATION

### Stability of ZIF-8 nanoparticles in most common cell culture media

Anna S. Spitsyna<sup>1,2</sup>, Artem S. Poryvaev,<sup>1</sup> Natalya E. Sannikova<sup>1</sup>, Anastasiya A. Yazikova,<sup>1</sup> Igor A. Kirilyuk,<sup>2</sup> Sergey A. Dobrynin,<sup>2</sup> Olga A. Chinak,<sup>3</sup> Matvey V. Fedin<sup>1\*</sup> and Olesya A. Krumkacheva<sup>1\*</sup>

<sup>1</sup> International Tomography Center SB RAS, Novosibirsk, 630090, Russia

<sup>2</sup> N.N.Vorozhtsov Institute of Organic Chemistry SB RAS Novosibirsk, 630090, Russia

<sup>3</sup> Institute of Chemical Biology and Fundamental Medicine, Novosibirsk, 630090, Russia

### Table of contents

|                                                                                                      |    |
|------------------------------------------------------------------------------------------------------|----|
| Cell culture media composition                                                                       | 2  |
| Results of simulation of experimental spectra.                                                       | 4  |
| Parameters $\beta$ , $K_a$ , and fraction of spin probes escaped from ZIF-8 for studied amino acids. | 5  |
| Particle size distribution                                                                           | 6  |
| CW EPR spectra of initial R@ZIF-8 and R@ZIF-8 5-fold diluted with water                              | 7  |
| CW EPR of R@ZIF-8 in different media                                                                 | 7  |
| Spectra of R@ZIF-8 in MEM at different concentrations                                                | 8  |
| EPR spectra of R@ZIF-8 with amino acids                                                              | 9  |
| EPR spectra at different concentrations of amino acids                                               | 9  |
| EPR spectra of samples with 2-methylimidazole (MIM) addition.                                        | 10 |
| Cytotoxic activity of MIM in A549 cells.                                                             | 11 |

## Cell culture media composition

**Table S1.** Cell culture media composition. The concentration units of all compounds are  $10^{-5}$  M. Color code for media names corresponds to the colors in Figure 3.

|                                       | MEM        | 199        | RPMI       | alpha-MEM  | DMEM        | IMDM        | L15         |
|---------------------------------------|------------|------------|------------|------------|-------------|-------------|-------------|
| L-Alanine                             | 0          | 28         | 0          | 28         | 0           | 28          | 250         |
| L-Arginine                            | 60         | 33         | 110        | 60         | 40          | 40          | 290         |
| L-Asparagine                          | 0          | 30         | 170        | 33         | 0           | 19          | 7,6         |
| Aspartic acid                         | 0          | 23         | 15         | 23         | 0           | 23          | 0           |
| L-Cysteine                            | 0          | 0,056      | 0          | 57         | 0           | 0           | 99          |
| L-Cystine                             | 10         | 9,9        | 21         | 10         | 20          | 29          | 0           |
| L-Glutamate                           | 0          | 45         | 14         | 51         | 0           | 51          | 0           |
| L-Glutamine                           | 200        | 68         | 210        | 200        | 400         | 400         | 210         |
| L-Glycine                             | 0          | 67         | 13         | 67         | 40          | 40          | 27          |
| L-Histidine                           | 20         | 10         | 9,7        | 20         | 20          | 20          | 160         |
| Hydroxyproline                        | 0          | 7,6        | 15         | 0          | 0           | 0           | 0           |
| L-Isoleucine                          | 40         | 15         | 38         | 40         | 80          | 80          | 95          |
| L-Leucine                             | 40         | 46         | 38         | 40         | 80          | 80          | 95          |
| L-Lysine HCl                          | 40         | 38         | 22         | 40         | 80          | 80          | 51          |
| L-Methionine                          | 10         | 10         | 10         | 10         | 20          | 20          | 50          |
| L-Phenylalanine                       | 20         | 15         | 9,1        | 19         | 40          | 40          | 76          |
| L-Proline                             | 0          | 35         | 17         | 35         | 0           | 35          | 0           |
| L-Serine                              | 0          | 24         | 29         | 24         | 40          | 40          | 190         |
| L-Threonine                           | 40         | 25         | 17         | 40         | 80          | 80          | 250         |
| L-Tryptophan                          | 4,9        | 4,9        | 2,5        | 4,9        | 7,8         | 8           | 9,8         |
| L-Tyrosine                            | 20         | 22         | 11         | 23         | 40          | 39          | 170         |
| L-Valine                              | 40         | 21         | 17         | 39         | 80          | 80          | 85          |
| <b>Total aminoacids concentration</b> | <b>545</b> | <b>577</b> | <b>788</b> | <b>864</b> | <b>1068</b> | <b>1232</b> | <b>2115</b> |

|                                  | MEM   | 199   | RPMI  | alpha-MEM | DMEM  | IMDM     | L15   |
|----------------------------------|-------|-------|-------|-----------|-------|----------|-------|
| Phenol Red•Na                    | 2,7   | 4,5   | 1,3   | 2,9       | 4     | 4,239871 | 2,7   |
| CaCl <sub>2</sub>                | 180   | 130   |       | 180       | 180   | 149      | 130   |
| KCl                              | 530   | 530   | 530   | 53        | 530   | 443      | 530   |
| KH <sub>2</sub> PO <sub>4</sub>  |       | 44    |       |           |       |          | 44    |
| MgCl <sub>2</sub>                |       |       |       | 2000      |       |          |       |
| MgSO <sub>4</sub>                | 81    | 81    | 40    | 81        | 81    | 81       | 160   |
| NaCl                             | 12000 | 14000 | 10000 |           | 11000 | 7709     | 14000 |
| NaHCO <sub>3</sub>               | 2600  |       | 420   | 2600      | 4400  | 3600     |       |
| NaH <sub>2</sub> PO <sub>4</sub> | 100   |       |       |           | 91    | 91       |       |
| Na <sub>2</sub> HPO <sub>4</sub> |       | 40    | 560   |           |       |          | 0     |
| D-Glucose                        | 560   | 560   | 1100  | 560       | 2500  | 2498     |       |
| D-Galactose                      |       |       |       |           |       |          | 5000  |

|                                   | MEM   | 199    | RPMI    | alpha-MEM | DMEM  | IMDM  | L15    |
|-----------------------------------|-------|--------|---------|-----------|-------|-------|--------|
| Pyruvic Acid•Na                   |       |        |         | 100       | 100   | 99    | 500    |
| Linoleic acid                     |       |        |         |           | 0,03  |       |        |
| Lipoic acid                       |       |        |         | 0,097     |       |       |        |
| Para-aminobenzoic acid            |       | 0,036  | 0,73    |           |       |       |        |
| L-ascorbic acid                   |       | 0,028  |         | 25        |       |       |        |
| Biotin                            |       | 0,0041 | 0,082   | 0,041     |       | 0,005 |        |
| Choline Chloride                  | 0,71  | 0,36   | 2,1     | 0,71      | 2,9   | 2,86  | 0,71   |
| Folic Acid                        | 0,23  | 0,0023 | 0,23    | 0,23      | 0,91  | 0,91  | 0,23   |
| Myo-inositol                      | 1,1   | 0,028  | 19      | 1,1       | 4     | 4,00  | 1,1    |
| Nicotinamide                      | 0,82  | 0,02   | 0,82    | 0,82      | 3,3   | 3,28  | 0,82   |
| Nicotinic acid                    |       | 0,02   |         |           |       |       |        |
| DL-Pantothenic Acid (hemicalcium) | 0,42  | 0,0042 | 0,11    | 0,42      | 1,7   | 1,67  | 0,42   |
| Pyridoxine•HCl                    |       | 0,012  | 0,49    |           |       |       |        |
| Pyridoxal •HCl                    | 0,49  | 0,012  |         | 0,49      | 2     | 1,96  |        |
| Riboflavin                        | 0,027 | 0,0027 | 0,053   | 0,027     | 0,11  | 0,11  | 0,0019 |
| Thiamine                          | 0,3   | 0,003  | 0,3     | 0,3       | 1,2   | 1,33  | 0,24   |
| α-Tocopherol                      |       | 0,0023 |         |           |       |       |        |
| B12                               |       |        | 0,00037 | 0,1       |       | 0,001 |        |
| Hypoxanthin                       |       | 0,22   |         |           |       |       |        |
| Fe(NO3)3 9H2O                     |       |        |         |           | 0,025 |       |        |
| FeSO4 7H2O                        |       |        |         |           |       |       |        |
| ZnSO4 7H2O                        |       |        |         |           |       |       |        |
| CuSO4 5H2O                        |       |        |         |           |       |       |        |
| Thymidine                         |       |        |         | 4,1       |       |       |        |
| Adenine SO4                       |       | 5,4    |         |           |       |       |        |
| Adenosine                         |       |        |         | 3,7       |       |       |        |
| AMP                               |       | 0,058  |         |           |       |       |        |
| ATP                               |       | 1,8    |         |           |       |       |        |
| Cytidine                          |       |        |         | 4,1       |       |       |        |
| D-adenosine                       |       |        |         | 4         |       |       |        |
| D-cytidine                        |       |        |         | 4,2       |       |       |        |
| D-guanosine                       |       |        |         | 3,7       |       |       |        |
| 2-deoxyribose                     |       | 0,37   |         |           |       |       |        |
| Guanine                           |       | 0,16   |         |           |       |       |        |
| Guanosine                         |       |        |         | 3,5       |       |       |        |
| D-ribose                          |       | 0,33   |         |           |       |       |        |
| Thymine                           |       | 0,24   |         |           |       |       |        |
| Uracil                            |       | 0,27   |         |           |       |       |        |
| Uridine                           |       |        |         | 4,1       |       |       |        |
| Xanthine                          |       | 0,2    |         |           |       |       |        |
| Tween-80                          |       | 1,8    |         |           |       |       |        |
| Putrescine                        |       |        |         |           |       |       |        |

|                                  | MEM | 199   | RPMI | alpha-MEM | DMEM | IMDM | L15 |
|----------------------------------|-----|-------|------|-----------|------|------|-----|
| Calciferol                       |     | 0,025 |      |           |      |      |     |
| P-retinol acetate                |     | 0,035 |      |           |      |      |     |
| HEPES                            |     |       |      |           |      | 2500 |     |
| Sodium acetate                   |     | 0,45  |      |           |      |      |     |
| Na <sub>2</sub> SeO <sub>3</sub> |     |       |      |           |      | 0,01 |     |
| KNO <sub>3</sub>                 |     |       |      |           |      | 0,08 |     |

## Results of simulation of experimental spectra.

**Table S2.** Fraction of the probe inside ZIF-8 calculated from the CW EPR spectra.

| Sample              | Fraction of loaded guest molecules, % |  | Sample                    | Fraction of loaded guest molecules, % |
|---------------------|---------------------------------------|--|---------------------------|---------------------------------------|
| HEPES (pH=7.4)      | 91                                    |  | MEM                       | 56                                    |
| HEPES (pH=7.8)      | 94                                    |  | MEM + 10 mM MIM           | 61                                    |
| PBS (pH=7.4)        | 76                                    |  | MEM + 30 mM MIM           | 61                                    |
| PBS (pH=7.8)        | 88                                    |  | OPTIMEM                   | 27                                    |
| 10% FBS             | 94                                    |  | OPTIMEM + 10 mM MIM       | 41                                    |
| 10% FBS + 10 mM MIM | 93                                    |  | RPMI                      | 8                                     |
| 199                 | 63                                    |  | RPMI + 10 mM MIM          | 13                                    |
| 199 + 10 mM MIM     | 70                                    |  | $\alpha$ -MEM             | 52                                    |
| DMEM                | 30                                    |  | $\alpha$ -MEM + 10 mM MIM | 53                                    |
| DMEM + 10 mM MIM    | 46                                    |  |                           |                                       |
| DMEM + 30 mM MIM    | 58                                    |  |                           |                                       |
| IMDM                | 15                                    |  |                           |                                       |
| IMDM + 10 mM MIM    | 20                                    |  |                           |                                       |
| L-15                | 11                                    |  |                           |                                       |
| L-15 + 10 mM MIM    | 22                                    |  |                           |                                       |
| L-15 + 30 mM MIM    | 36                                    |  |                           |                                       |
| Sample              | Fraction of loaded guest molecules, % |  | Sample                    | Fraction of loaded guest molecules, % |
| Ala                 | 78                                    |  | Lys                       | 80                                    |
| Arg                 | 80                                    |  | Lys 1 mM                  | 87                                    |
| Asn                 | 59                                    |  | Lys 10 mM                 | 66                                    |
| Asn + 10 mM MIM     | 77                                    |  | Met                       | 66                                    |
| Asp 2.5 mM          | 65                                    |  | Met + 10 mM MIM           | 76                                    |
| Cys                 | 17                                    |  | Phe                       | 47                                    |
| Cys + 10 mM MIM     | 10                                    |  | Phe + 10 mM MIM           | 63                                    |
| Cys 1 mM            | 71                                    |  | Pro                       | 84                                    |
| Cys 10 mM           | 1                                     |  | Ser                       | 61                                    |
| Cys 2.5 mM          | 52                                    |  | Ser + 10 mM MIM           | 85                                    |
| Glu                 | 73                                    |  | Ser 1 mM                  | 86                                    |

| Sample          | Fraction of loaded guest molecules, % |  | Sample          | Fraction of loaded guest molecules, % |
|-----------------|---------------------------------------|--|-----------------|---------------------------------------|
| Gly             | 72                                    |  | Ser 10 mM       | 51                                    |
| Gly + 10 mM MIM | 90                                    |  | Thr             | 62                                    |
| His             | 41                                    |  | Thr + 10 mM MIM | 73                                    |
| His + 10 mM MIM | 40                                    |  | Trp             | 63                                    |
| His 1 mM        | 86                                    |  | Trp + 10 mM MIM | 66                                    |
| His 10 mM       | 4                                     |  | Tyr 1mM         | 74                                    |
| His 2.5 mM      | 66                                    |  | Val             | 72                                    |
| Ile             | 75                                    |  | Leu             | 67                                    |

Parameters  $\beta$ ,  $K_a$ , and fraction of spin probes escaped from ZIF-8 for studied amino acids.

| Amino acid | Log( $\beta$ ) | pKa   | Log( $\beta$ )-2*pKa | Fraction of escaped guest molecules, % |
|------------|----------------|-------|----------------------|----------------------------------------|
| Pro        | 9,69           | 10,34 | -10,99               | 16,0                                   |
| Arg        | 7,56           | 8,82  | -10,08               | 20,4                                   |
| Ala        | 8,56           | 9,5   | -10,44               | 22,2                                   |
| Ile        | 8,08           | 9,36  | -10,64               | 25,3                                   |
| Glu        | 8,54           | 9,39  | -10,24               | 27,2                                   |
| Gln        | 7,94           | 8,83  | -9,72                | 27,8                                   |
| Val        | 8,24           | 9,32  | -10,4                | 27,9                                   |
| Gly        | 9,01           | 9,38  | -9,75                | 28,4                                   |
| Met        | 6,93           | 8,91  | -10,89               | 33,7                                   |
| Trp        | 8,76           | 9,085 | -9,41                | 36,7                                   |
| Thr        | 8,14           | 8,71  | -9,28                | 37,9                                   |
| Ser        | 8,31           | 8,84  | -9,37                | 39,1                                   |
| His        | 11,68          | 8,92  | -6,16                | 59,1                                   |
| Cys        | 17,98          | 10,23 | -2,48                | 83,5                                   |

We analyzed two processes:  $Zn^{2+} + 2AA \leftrightarrow Zn(AA)_2$  with constant  $\beta$  and  $HAA \leftrightarrow H^+ + AA^-$  with constant  $K_a$ , where AA is an amino acid and HAA indicates its protonated form. Equilibrium constants can be written as follows:

$$\beta = \frac{[ZnAA_2]}{[Zn^{2+}][AA^-]^2}; K_a = \frac{[H^+][AA^-]}{[HAA]}$$

And concentration of deprotonated amino acids is

$$[AA^-] = \frac{K_a[HAA]}{[H^+]}$$

Using this concentration in equation with  $\beta$  provides combination of  $\beta$  and  $K_a$ :

$$\beta = \frac{[ZnAA_2][H^+]^2}{[Zn^{2+}]K_a^2[HAA]^2}$$

$$\frac{\beta K_a^2 [HAA]^2}{[H^+]^2} = \frac{[ZnAA_2]}{[Zn^{2+}]}$$

Since the whole process of ZIF-8 dissolution and zinc interaction with amino acids is complicated, we analyzed correlation between  $\beta K_a^2$  and the amount of escaped radical.

## Particle size distribution

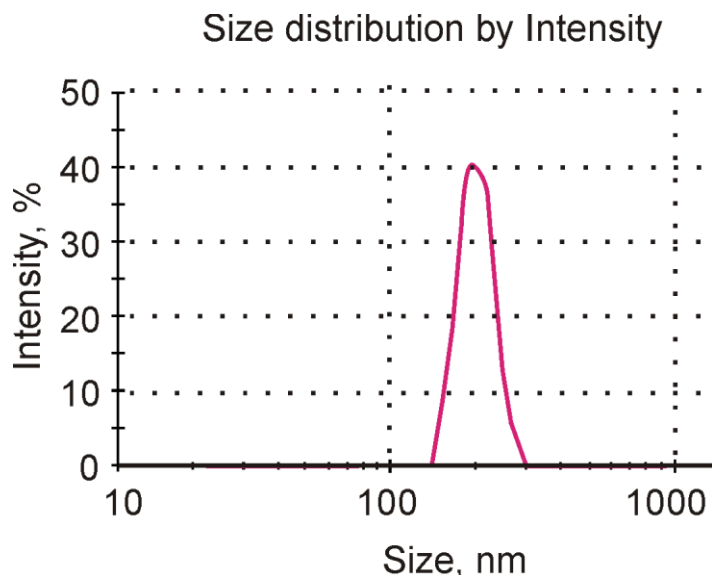

**Figure S1.** Particle size distribution curves of ZIF-8 nanoparticles in water measured by dynamic light scattering.

## CW EPR spectra of R@ZIF-8 at pH=4.0 and free radical R in H<sub>2</sub>O

Spectrum of fully dissociated R@ZIF-8 at pH=4 (citrate buffer) showed no differences compared to the spectrum of free radical in water.

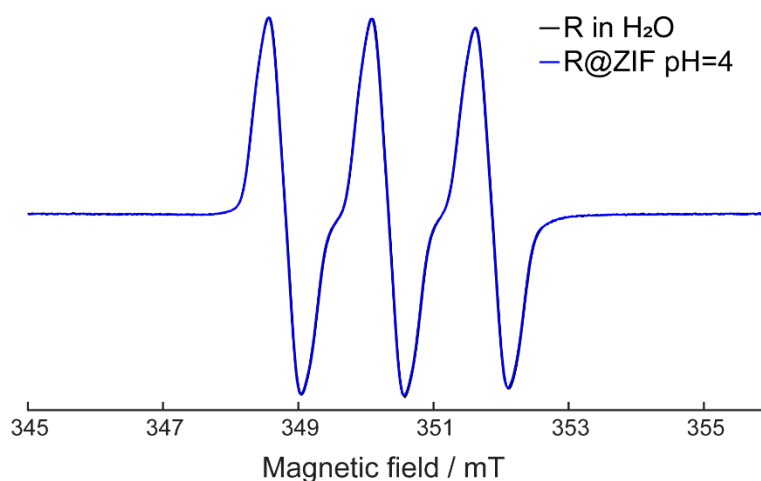

**Figure S2.** X-band room temperature CW EPR spectra of R@ZIF-8 at pH=4 and free radical R in water. Both spectra were normalized by double integral.

## CW EPR spectra of initial R@ZIF-8 and R@ZIF-8 5-fold diluted with water

R@ZIF-8 dilution with water did not lead to MOF degradation: 99% of the spectrum corresponds to the loaded fraction.

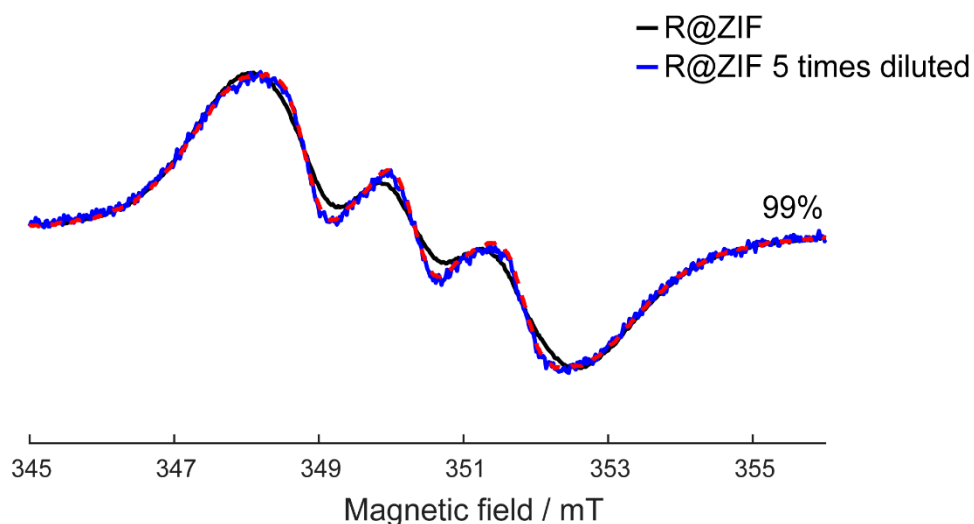

**Figure S3.** X-band room temperature CW EPR spectra of R@ZIF-8 and R@ZIF-8 diluted with water. Red dashed line shows spectrum simulation, the number on the right – the fraction of the probe inside ZIF-8. Spectra were normalized by double integral.

## CW EPR of R@ZIF-8 in different media

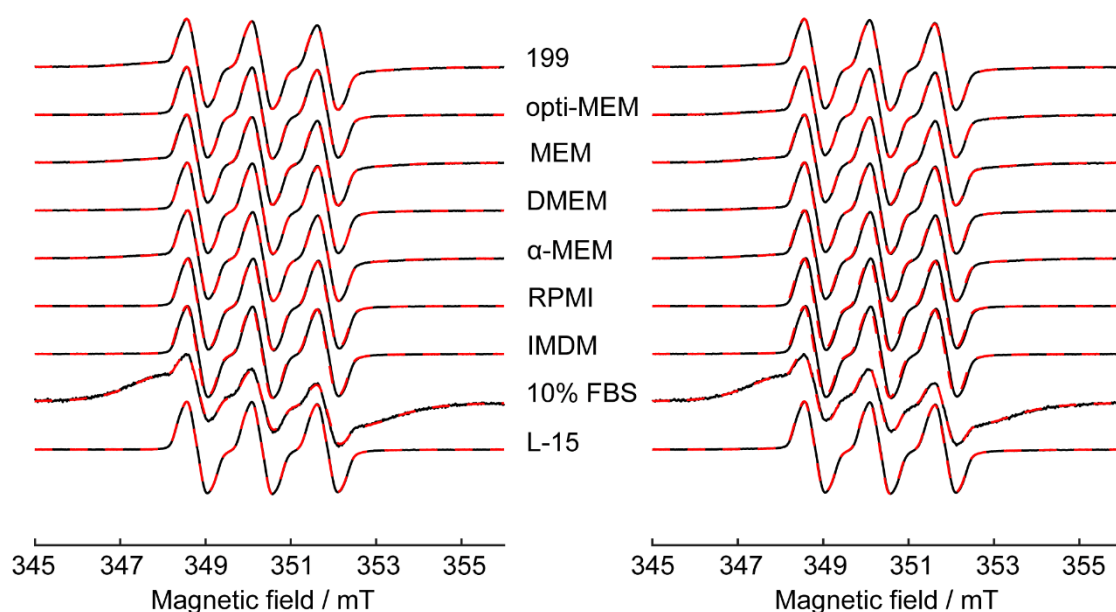

**Figure S4.** X-band room temperature CW EPR spectra of R@ZIF-8 after 5-fold dilution in culture media. On the left - spectra of samples without MIM, on the right - samples with

addition of 10mM MIM. Red dashed lines show simulations. All spectra were normalized by double integral.

## Spectra of R@ZIF-8 in MEM at different concentrations

We diluted initial R@ZIF-8 with MEM 5-, 10- and 15-times v/v. The results demonstrated that the amount of escaped guest molecules increased with the amount of MEM added. The 10 and 15 times diluted sample spectrum had no component corresponding to the R@ZIF-8.

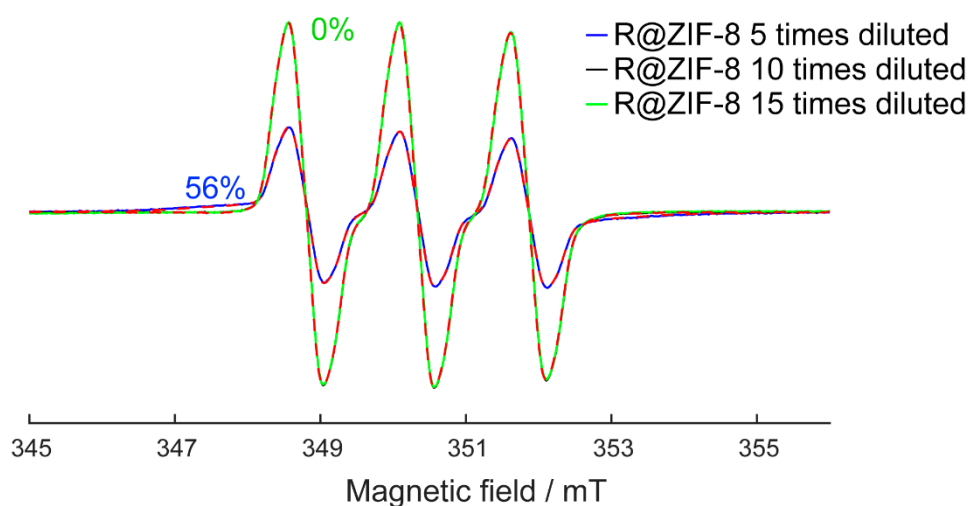

**Figure S5.** X-band room temperature CW EPR spectra of R@ZIF-8 and R@ZIF-8 diluted with MEM. Red dashed lines show spectra simulation, the numbers on the figure demonstrate fractions of loaded guest molecules, color code corresponds to the legend. All spectra were normalized by double integral.



## EPR spectra of R@ZIF-8 with amino acids

All amino acids were dissolved in 5mM HEPES buffer, pH=7.4 at 5mM concentration except for Asp – 2.5mM Tyr – 1mM. Tyr and Asp were poorly soluble at this concentration.

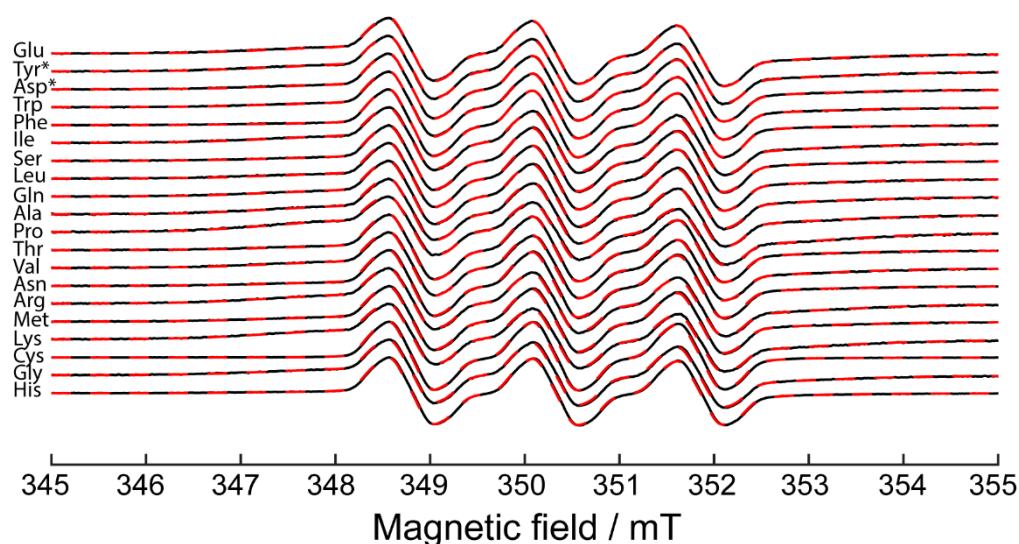

**Figure S6.** X-band room temperature CW EPR spectra of R@ZIF-8 after addition of amino acids with 5mM concentration (except Trp and Asp). Red dashed lines show simulations. All spectra were normalized by double integral.

## EPR spectra at different concentrations of amino acids

All samples were made with a 5mM HEPES buffer at pH=7.4.

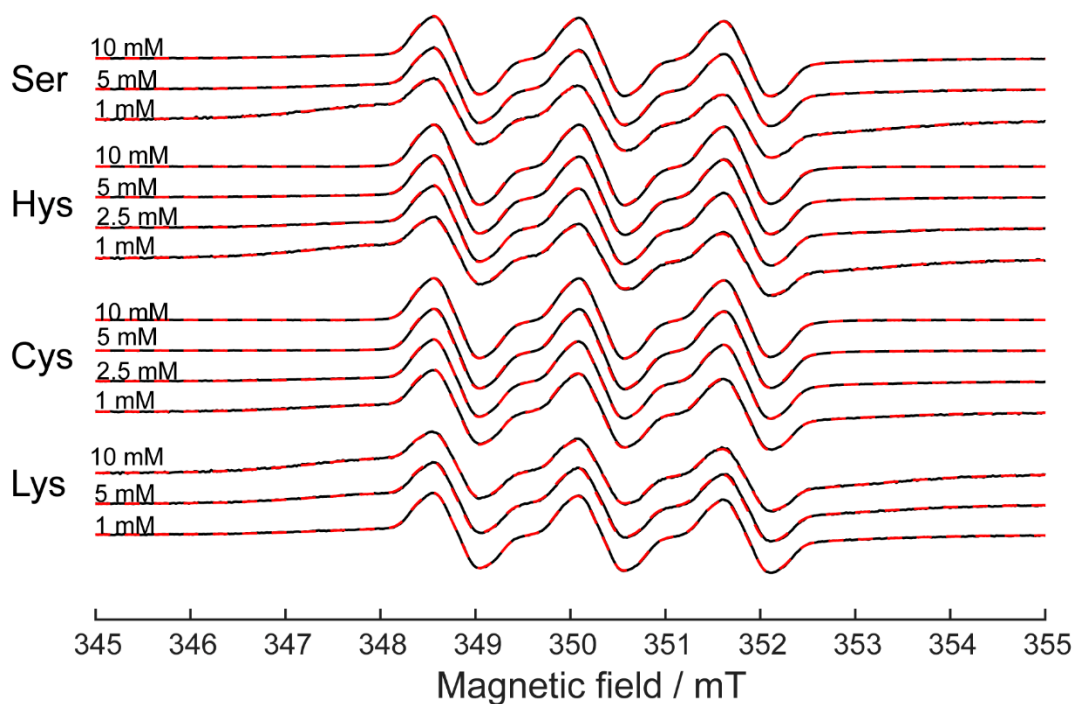

**Figure S7.** CW EPR spectra of R@ZIF-8 with amino acids addition at different concentrations. Red dashed lines show spectra simulation. All spectra were normalized by double integral.

## EPR spectra of samples with 2-methylimidazole (MIM) addition.

We added 10mM MIM to all culture media and 9 amino acids to test whether MIM would stabilize nanoparticles. Moreover, MEM, DMEM and L-15 were tested with 30mM MIM. All solutions had pH=7.4. MIM addition resulted in increase of the broad spectrum component, therefore, the amount of dissolved nanoparticles decreased.

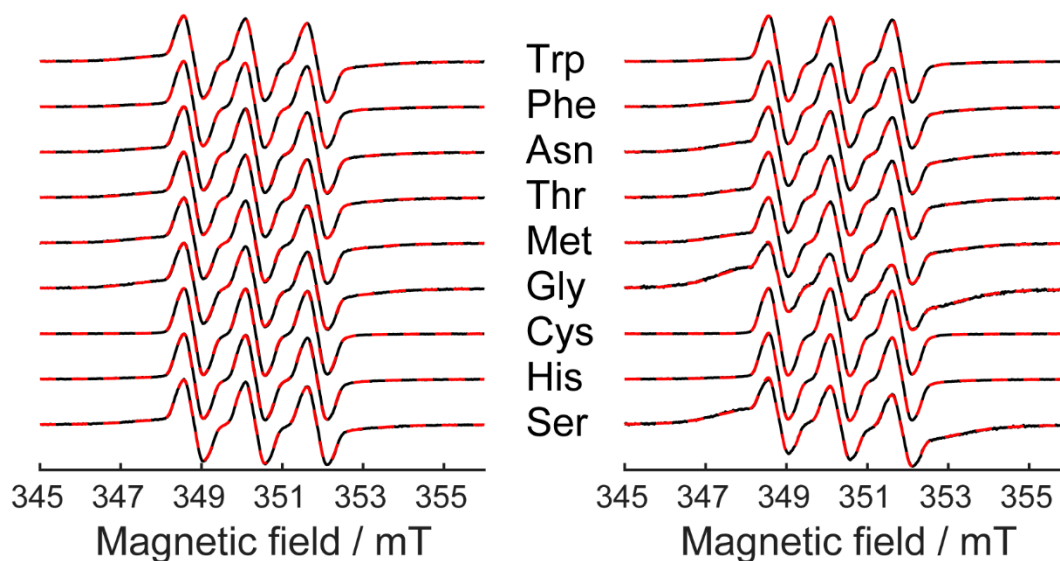

**Figure S8.** CW EPR spectra of R@ZIF-8 with addition of amino acids (5mM concentration). On the left - spectra of samples without MIM, on the right - samples with addition of 10mM MIM. Red dashed lines show spectra simulation. All spectra are normalized by double integral.

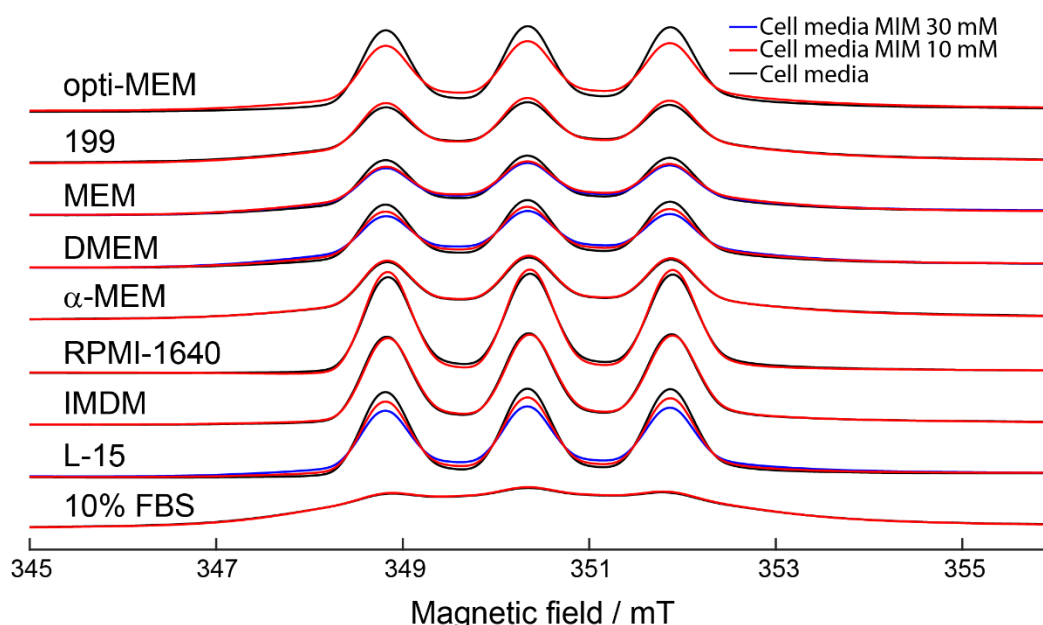

**Figure S9.** First integrals of CW EPR spectra of R@ZIF-8 after culture media addition, with and without MIM. All spectra are normalized by double integral.

### Cytotoxic activity of MIM in A549 cells.

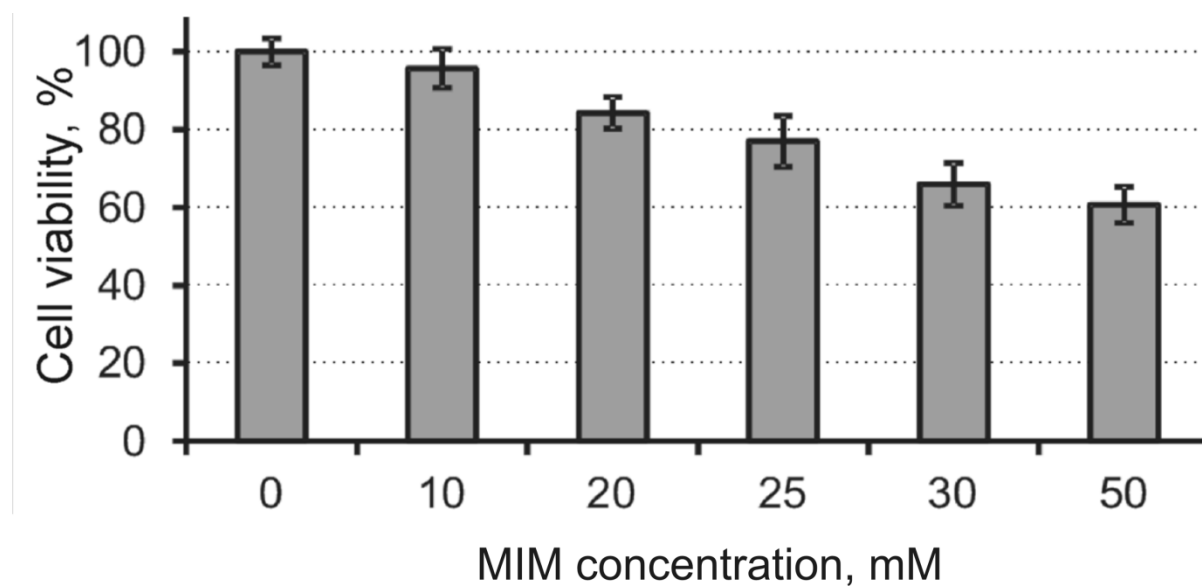

**Figure S10.** Cytotoxic activity of MIM in A549 cells. Cells were treated with different MIM concentration, and after 24 h of incubation, cells viability was analyzed by MTT assay.
